# Supplementary material
Source: Research Square preprint supplement (doi:10.21203/rs.3.rs-9853701/v1)
Supplement: Supplementary file 1 [file 580ec065253fc4cde30cb401.pdf]

| UniProt ID | Gene Symbol | Protein Name                                                     | Matrisome Division   | Matrisome Category      | Fractions Detected (Control) | Fractions Detected (AD)     | Solubility Shift |
|------------|-------------|------------------------------------------------------------------|----------------------|-------------------------|------------------------------|-----------------------------|------------------|
| P09668     | CTSH        | Pro-cathepsin H                                                  | Matrisome-associated | ECM Regulators          | NaCl                         | GuHCl / NaCl / pellet / SDS | Insoluble        |
| O14672     | ADAM10      | Disintegrin and metalloproteinase domain-containing protein 10   | Matrisome-associated | ECM Regulators          | NaCl / SDS                   | pellet / SDS                | Insoluble        |
| P07711     | CTSL        | Procathepsin L                                                   | Matrisome-associated | ECM Regulators          | NaCl                         | NaCl / pellet / SDS         | Insoluble        |
| P19827     | ITIH1       | Inter-alpha-trypsin inhibitor heavy chain H1                     | Matrisome-associated | ECM Regulators          | NaCl                         | NaCl / pellet / SDS         | Insoluble        |
| O95428     | PAPLN       | Papilin                                                          | Core matrisome       | ECM Glycoproteins       | GuHCl / NaCl / SDS           | GuHCl / pellet / SDS        | Insoluble        |
| P04271     | S100B       | Protein S100-B                                                   | Matrisome-associated | Secreted Factors        | NaCl / SDS                   | GuHCl / NaCl / pellet / SDS | Insoluble        |
| P00740     | F9          | Coagulation factor IX                                            | Matrisome-associated | ECM Regulators          | GuHCl / NaCl                 | GuHCl / NaCl / pellet       | Insoluble        |
| P02760     | AMBP        | Protein AMBP                                                     | Matrisome-associated | ECM Regulators          | GuHCl / NaCl / SDS           | GuHCl / NaCl / pellet / SDS | Insoluble        |
| Q99944     | EGFL8       | Epidermal growth factor-like protein 8                           | Matrisome-associated | Secreted Factors        | GuHCl / pellet / SDS         | GuHCl / pellet              | Insoluble        |
| P31949     | S100A11     | Protein S100-A11                                                 | Matrisome-associated | Secreted Factors        | GuHCl / NaCl / SDS           | GuHCl / NaCl / pellet / SDS | Insoluble        |
| O94769     | ECM2        | Extracellular matrix protein 2                                   | Core matrisome       | ECM Glycoproteins       | GuHCl / SDS                  | GuHCl / pellet / SDS        | Insoluble        |
| P13674     | P4HA1       | Prolyl 4-hydroxylase subunit alpha-1                             | Matrisome-associated | ECM Regulators          | NaCl / SDS                   | GuHCl / NaCl / SDS          | Insoluble        |
| Q9NT22     | EMILIN3     | EMILIN-3                                                         | Core matrisome       | ECM Glycoproteins       | GuHCl / pellet / SDS         | GuHCl / pellet              | Insoluble        |
| P21246     | PTN         | Pleiotrophin                                                     | Matrisome-associated | Secreted Factors        | GuHCl / NaCl / SDS           | GuHCl / NaCl / pellet / SDS | Insoluble        |
| Q81WU5     | SULF2       | Extracellular sulfatase                                          | Matrisome-associated | ECM Regulators          | SDS                          | GuHCl / SDS                 | Insoluble        |
| O60486     | PLXNC1      | Plexin-C1                                                        | Matrisome-associated | ECM-affiliated Proteins | SDS                          | GuHCl / SDS                 | Insoluble        |
| Q13201     | MMRN1       | Multimerin-1                                                     | Core matrisome       | ECM Glycoproteins       | GuHCl / SDS                  | GuHCl / pellet / SDS        | Insoluble        |
| Q8IZC6     | COL27A1     | Collagen alpha-1(XXVII) chain                                    | Core matrisome       | Collagens               | GuHCl / pellet / SDS         | GuHCl / pellet              | Insoluble        |
| P05452     | CLEC3B      | Tetranectin                                                      | Matrisome-associated | ECM-affiliated Proteins | GuHCl / NaCl / SDS           | GuHCl / NaCl / pellet / SDS | Insoluble        |
| O43405     | COCH        | Cochlin                                                          | Core matrisome       | ECM Glycoproteins       | GuHCl / NaCl / SDS           | GuHCl / NaCl / pellet / SDS | Insoluble        |
| O43854     | EDIL3       | EGF-like repeat and discoidin I-like domain-containing protein 3 | Core matrisome       | ECM Glycoproteins       | GuHCl / SDS                  | GuHCl / pellet / SDS        | Insoluble        |
| P08311     | CTSG        | Cathepsin G                                                      | Matrisome-associated | ECM Regulators          | GuHCl / NaCl / SDS           | GuHCl / NaCl / pellet / SDS | Insoluble        |
| P16112     | ACAN        | Aggrecan core protein                                            | Core matrisome       | Proteoglycans           | GuHCl / SDS                  | GuHCl / pellet / SDS        | Insoluble        |
| P34741     | SDC2        | Syndecan-2                                                       | Matrisome-associated | ECM-affiliated Proteins | NaCl / SDS                   | SDS                         | Insoluble        |
| O95631     | NTN1        | Netrin-1                                                         | Core matrisome       | ECM Glycoproteins       | GuHCl / SDS                  | GuHCl / pellet / SDS        | Insoluble        |
| P21741     | MDK         | Midkine                                                          | Matrisome-associated | Secreted Factors        | GuHCl / SDS                  | GuHCl / pellet / SDS        | Insoluble        |
| Q96RW7     | HMCN1       | Hemicentin-1                                                     | Core matrisome       | ECM Glycoproteins       | GuHCl / SDS                  | GuHCl / pellet / SDS        | Insoluble        |
| P23297     | S100A1      | Protein S100-A1                                                  | Matrisome-associated | Secreted Factors        | NaCl                         | NaCl / SDS                  | Insoluble        |
| P02746     | C1QB        | Complement C1q subcomponent subunit B                            | Matrisome-associated | ECM-affiliated Proteins | GuHCl / NaCl                 | GuHCl / NaCl / pellet / SDS | Insoluble        |
| P53420     | COL4A4      | Collagen alpha-4(IV) chain                                       | Core matrisome       | Collagens               | GuHCl / NaCl / pellet / SDS  | GuHCl / pellet / SDS        | Insoluble        |
| P01034     | CST3        | Cystatin-C                                                       | Matrisome-associated | ECM Regulators          | GuHCl / NaCl / SDS           | GuHCl / NaCl / pellet / SDS | Insoluble        |
| P50995     | ANXA11      | Annexin A11                                                      | Matrisome-associated | ECM-affiliated Proteins | GuHCl / NaCl / SDS           | GuHCl / NaCl / pellet / SDS | Insoluble        |
| Q16270     | IGFBP7      | Insulin-like growth factor-binding protein 7                     | Core matrisome       | ECM Glycoproteins       | GuHCl / NaCl / SDS           | GuHCl / NaCl / pellet / SDS | Insoluble        |
| P01011     | SERPINA3    | Alpha-1-antichymotrypsin                                         | Matrisome-associated | ECM Regulators          | GuHCl / NaCl / SDS           | GuHCl / NaCl / pellet / SDS | Insoluble        |
| P06702     | S100A9      | Protein S100-A9                                                  | Matrisome-associated | Secreted Factors        | GuHCl / NaCl / SDS           | GuHCl / NaCl / pellet / SDS | Insoluble        |
| P50454     | SERPINH1    | Serpin H1                                                        | Matrisome-associated | ECM Regulators          | GuHCl / NaCl / SDS           | GuHCl / NaCl / pellet / SDS | Insoluble        |
| P39059     | COL15A1     | Collagen alpha-1(XV) chain                                       | Core matrisome       | Collagens               | GuHCl / NaCl / pellet / SDS  | GuHCl / pellet / SDS        | Insoluble        |
| Q9Y6C2     | EMILIN1     | EMILIN-1                                                         | Core matrisome       | ECM Glycoproteins       | GuHCl / NaCl / pellet / SDS  | GuHCl / pellet / SDS        | Insoluble        |
| Q16363     | LAMA4       | Laminin subunit alpha-4                                          | Core matrisome       | ECM Glycoproteins       | GuHCl / pellet / SDS         | GuHCl / NaCl / pellet / SDS | Soluble          |
| Q07092     | COL16A1     | Collagen alpha-1(XVI) chain                                      | Core matrisome       | Collagens               | GuHCl / pellet / SDS         | GuHCl / NaCl / pellet / SDS | Soluble          |
| Q13214     | SEMA3B      | Semaphorin-3B                                                    | Matrisome-associated | ECM-affiliated Proteins | GuHCl / pellet               | GuHCl / pellet / SDS        | Soluble          |
| Q16787     | LAMA3       | Laminin subunit alpha-3                                          | Core matrisome       | ECM Glycoproteins       | GuHCl / pellet / SDS         | GuHCl / NaCl / pellet / SDS | Soluble          |
| O15031     | PLXNB2      | Plexin-B2                                                        | Matrisome-associated | ECM-affiliated Proteins | SDS                          | NaCl / SDS                  | Soluble          |
| P02790     | HPX         | Hemopexin                                                        | Matrisome-associated | ECM-affiliated Proteins | GuHCl / NaCl / SDS           | NaCl / SDS                  | Soluble          |
| Q6UXI9     | NPNT        | Nephronectin                                                     | Core matrisome       | ECM Glycoproteins       | GuHCl / pellet               | GuHCl / pellet / SDS        | Soluble          |
| P01008     | SERPINC1    | Antithrombin-III                                                 | Matrisome-associated | ECM Regulators          | GuHCl / NaCl / SDS           | NaCl / SDS                  | Soluble          |
| P35625     | TIMP3       | Metalloproteinase inhibitor 3                                    | Matrisome-associated | ECM Regulators          | GuHCl / pellet / SDS         | GuHCl / NaCl / pellet / SDS | Soluble          |
| Q14766     | LTBP1       | Latent-transforming growth factor beta-binding protein 1         | Core matrisome       | ECM Glycoproteins       | GuHCl / pellet / SDS         | GuHCl / NaCl / pellet / SDS | Soluble          |
| P15502     | ELN         | Elastin                                                          | Core matrisome       | ECM Glycoproteins       | GuHCl / pellet               | GuHCl / pellet / SDS        | Soluble          |
| Q15063     | POSTN       | Periostin                                                        | Core matrisome       | ECM Glycoproteins       | GuHCl / pellet / SDS         | GuHCl / NaCl / pellet / SDS | Soluble          |
| P07477     | PRSS1       | Serine protease 1                                                | Matrisome-associated | ECM Regulators          | GuHCl / pellet / SDS         | GuHCl / NaCl / pellet / SDS | Soluble          |
| P02775     | PPBP        | Platelet basic protein                                           | Matrisome-associated | Secreted Factors        | NaCl / SDS                   | NaCl                        | Soluble          |
| P27658     | COL8A1      | Collagen alpha-1(VIII) chain                                     | Core matrisome       | Collagens               | GuHCl / pellet / SDS         | GuHCl / NaCl / pellet / SDS | Soluble          |
| Q9Y6N6     | LAMC3       | Laminin subunit gamma-3                                          | Core matrisome       | ECM Glycoproteins       | GuHCl / NaCl / pellet / SDS  | GuHCl / NaCl / SDS          | Soluble          |
| P02747     | C1QC        | Complement C1q subcomponent subunit C                            | Matrisome-associated | ECM-affiliated Proteins | GuHCl / NaCl / pellet / SDS  | GuHCl / NaCl / SDS          | Soluble          |
| P25391     | LAMA1       | Laminin subunit alpha-1                                          | Core matrisome       | ECM Glycoproteins       | GuHCl / SDS                  | GuHCl / NaCl / SDS          | Soluble          |
| Q9Y625     | GPC6        | Glypican-6                                                       | Matrisome-associated | ECM-affiliated Proteins | SDS                          | NaCl / SDS                  | Soluble          |
| P78539     | SRPX        | Sushi repeat-containing protein SRPX                             | Core matrisome       | ECM Glycoproteins       | GuHCl / pellet / SDS         | GuHCl / NaCl / pellet / SDS | Soluble          |
| Q5KU26     | COLEC12     | Collectin-12                                                     | Matrisome-associated | ECM-affiliated Proteins | pellet / SDS                 | GuHCl / NaCl / pellet / SDS | Soluble          |
| Q8TAD2     | IL17D       | Interleukin-17D                                                  | Matrisome-associated | Secreted Factors        | pellet                       | GuHCl / pellet              | Soluble          |
| P35442     | THBS2       | Thrombospondin-2                                                 | Core matrisome       | ECM Glycoproteins       | GuHCl / NaCl / SDS           | NaCl / SDS                  | Soluble          |
| P10619     | CTSA        | Lysosomal protective protein                                     | Matrisome-associated | ECM Regulators          | SDS                          | NaCl / SDS                  | Soluble          |
| Q9UBX1     | CTSF        | Cathepsin F                                                      | Matrisome-associated | ECM Regulators          | GuHCl                        | GuHCl / NaCl / pellet / SDS | Soluble          |
| Q93097     | WNT2B       | Protein Wnt-2b                                                   | Matrisome-associated | Secreted Factors        | GuHCl / pellet               | GuHCl / pellet / SDS        | Soluble          |
| P53634     | CTSC        | Dipeptidyl peptidase 1                                           | Matrisome-associated | ECM Regulators          | GuHCl / NaCl                 | NaCl / SDS                  | Soluble          |
| Q14031     | COL4A6      | Collagen alpha-6(IV) chain                                       | Core matrisome       | Collagens               | GuHCl / SDS                  | GuHCl / NaCl                | Soluble          |
| O60687     | SRPX2       | Sushi Repeat Containing Protein X-Linked 2                       | Core matrisome       | ECM Glycoproteins       | GuHCl / pellet / SDS         | GuHCl / NaCl / pellet / SDS | Soluble          |
| P50453     | SERPINB9    | Serpin B9                                                        | Matrisome-associated | ECM Regulators          | NaCl / pellet / SDS          | NaCl / SDS                  | Soluble          |
| Q14515     | SPARCL1     | SPARC-like protein 1                                             | Core matrisome       | ECM Glycoproteins       | GuHCl / NaCl / pellet / SDS  | NaCl / SDS                  | Soluble          |
| Q8N135     | LGI4        | Leucine-rich repeat LGI family member 4                          | Core matrisome       | ECM Glycoproteins       | pellet                       | GuHCl / pellet / SDS        | Soluble          |
| O75487     | GPC4        | Glypican-4                                                       | Matrisome-associated | ECM-affiliated Proteins | GuHCl / SDS                  | NaCl / SDS                  | Soluble          |
| Q06033     | ITIH3       | Inter-alpha-trypsin inhibitor heavy chain H3                     | Matrisome-associated | ECM Regulators          | GuHCl / NaCl                 | NaCl                        | Soluble          |
| O00182     | LGALS9      | Galectin-9                                                       | Matrisome-associated | ECM-affiliated Proteins | GuHCl / SDS                  | NaCl / SDS                  | Soluble          |
